# Supplementary material for: MoS2-modified graphite felt as a high performance electrode material for zinc–polyiodide redox flow batteries
Source: Royal Society of Chemistry journal article supplement (doi:10.1039/c8qi01341a), 2019-01-01
Supplement: c8qi01341a1.pdf [file c8qi01341a1.pdf]

## 27 **Experimental Section**

28 **Pretreating of graphite felts (GF):** To avoid impurities and enhance wettability, pristine GF  
29 were pretreated by several steps before used. Firstly, GF were rinsed in acetone overnight and  
30 then dried in air at 80 °C. Secondly, a solution of 200 g/L ammonium persulphate ((NH<sub>4</sub>)<sub>2</sub>S<sub>2</sub>O<sub>8</sub>)  
31 in 100 mL/L sulfuric acid was prepared. Thirdly, the GF were rinsed in the acid solution and  
32 ultra-sonicated for 15 min and then washed by DI-water and ethanol several times. Finally,  
33 GF were thermal treated at 450 °C for 30 min.

34 **Synthesis of MoS<sub>2</sub> nanoplates and MoS<sub>2</sub> nanoplates modified GF:** All chemicals for this  
35 experiment were used directly without further purification. Pure MoS<sub>2</sub> nanoplates were  
36 synthesized according to a previous report<sup>1</sup>. In a typical synthesis process, 20 mg ammonium  
37 thiomolybdate ((NH<sub>4</sub>)<sub>2</sub>MoS<sub>4</sub>, Sigma-Aldrich) was dispersed in the mixture (15 mL) of N,  
38 N-Dimethylformamide (DMF) and deionized (DI) water with volume ratio of 2:1 mixture. The  
39 mixture was ultra-sonicated for 30 min and then transferred into the autoclave, and maintained  
40 at 210 °C for 12 h. After cooling to room temperature naturally, the black precipitate was  
41 collected and washed by DI water and ethanol several times, and finally dried at 80 °C for 12h.  
42 To introduce MoS<sub>2</sub> nanoplates on the surface of GF, the GF were placed inside the precursor  
43 solution with different amount (NH<sub>4</sub>)<sub>2</sub>MoS<sub>4</sub> (15, 20, 25 mg), denoted as 15 mg, 20 mg, 25 mg  
44 MoS<sub>2</sub>@GF. After cooling to room temperature, the modified GF were rinsed with DI water  
45 several times until no obvious MoS<sub>2</sub> particles were observed in the wastewater stream. Then  
46 the modified GF electrodes were dried at 80 °C for 12h.

47 **Preparation of Zn<sup>2+</sup>-form Nafion membranes:** The Zn<sup>2+</sup>-form Nafion membranes (N-115  
48 from Hesen, Shanghai, China, active area of 4 cm<sup>2</sup>) were pretreated prior to use with the  
49 following steps: i) The Nafion membrane was soaked in 3 wt% H<sub>2</sub>O<sub>2</sub> aqueous solution at 60 °C  
50 for 1 hour. Then it was washed with DI water to remove the remaining H<sub>2</sub>O<sub>2</sub>; ii) The Nafion  
51 membrane was soaked in 0.5 M H<sub>2</sub>SO<sub>4</sub> at 60 °C for 1 hour and washed with DI water; iii) It was

52 soaked in 1 M ZnCl<sub>2</sub> aqueous solution (pH was adjusted to 1 by using HCl) at 60 °C for 3 hours  
53 to convert from the H<sup>+</sup>-form to the Zn<sup>2+</sup>-form. Then the membrane was rinsed with DI water  
54 and stored in DI water.

55 **Characterization:** All transmission electron microscopy (TEM) images and elemental  
56 mapping were taken from FEI Tecnai G2 F30S-Twin microscope, 300 kV. The morphology  
57 were recorded by scanning electron microscope (JSM-7800F). XRD analysis of different  
58 samples was carried out on a X-ray diffractometer (Bruker AXS D8, Cu K $\lambda$ ,  $\lambda$  = 1.5406 Å, 40  
59 kV and 20 mA). X-ray photoelectron spectroscopy (XPS) spectrum was measured on a VG  
60 Escalab 250 spectrometer equipped with an Al anode (Al K $\alpha$  = 1846.6 eV). N<sub>2</sub>  
61 adsorption/desorption isotherm was conducted to analyze the pore structure. The BET surface  
62 area was determined using adsorption data in the relative pressure (P/P<sub>0</sub>) range of 0.05–0.25.  
63 The presence of I<sub>3</sub><sup>-</sup>/I<sup>-</sup> in the compartment was determined by ultraviolet–visual spectroscopy  
64 using a UV–Vis spectrometer (JASCO V-550).

65 **Electrochemical measurements:** All electrochemical measurements were conducted on a  
66 VersaSTAT potentiostat/galvanostat (Princeton Applied Research) using a standard three  
67 electrode set-up with a glassy carbon disk working electrode (5 mm diameter), a Ag/AgCl  
68 reference electrode, and a Pt counter electrode at room temperature. The working electrode was  
69 prepared on a glass carbon (GC) disk as the substrate. Typically, a mixture containing 3.0 mg  
70 catalyst, 7.0 mg Vulcan carbon 72, 1.0 mL ethanol and 0.05 mL Nafion solution (0.05 wt%,  
71 Hesen) was ultrasonicated for 30 min to obtain a well-dispersed ink. Then 10  $\mu$ l of the catalyst  
72 ink (containing 28.6  $\mu$ g of catalyst) was loaded onto a glassy carbon electrode (loading ~ 0.136  
73 mg·cm<sup>-2</sup>). The presented current density refers to the geometric surface area of the glass carbon  
74 electrode.

75 **Charging/Discharging Tests:** The configuration and photographs of the components of the  
76 non-flow cell are shown in Figure S11. Generally, in the positive half-cell, a piece of graphite

77 felt (2.5 mm thickness and active geometric area of 1 cm<sup>2</sup>) was used as the electrode and a  
78 titanium wire was used as the current collector. As for the negative half-cell, zinc plate with a  
79 diameter of 12 mm was tin soldered on a titanium, serving as the electrode and current collector.  
80 The cell assembly was finished in the ambient air and then transferred to the argon-filled glove  
81 box. Active electrolyte with a volume of 2.5 mL was injected in each half-cell. The charge  
82 capacity was fixed to be 60% of the state of charge (SOC) in order to avoid unstable zinc  
83 electrolytic deposition/dissolution and improve the cyclic performance. The electrolytes were  
84 prepared by dissolving corresponding ZnI<sub>2</sub> (Jindian Chemical Co. Ltd., China, 99%) in an  
85 Argon (Ar)-saturated DI water in an Ar-filled glove box.

86 **Theoretical method:** Quantum chemistry calculations were carried out using the Vienna  
87 Ab-initio Simulation Package (VASP). The generalized gradient approximation (GGA) of the  
88 Perdew-Burke-Ernzerhof (PBE) exchange correlation function<sup>1</sup> was adopted with the  
89 plane-wave cutoff energy set at 400 eV. The criterion of convergence was set that the residual  
90 forces are less than 0.02 eV/Å and the change of the total energy was less than 10<sup>-4</sup> eV. The  
91 simulation was conducted assuming a vacuum condition.

92 The  $E_{ad}^I$  on the surface of the catalyst can be defined as follows<sup>2</sup>:

93 
$$E_{ad}^I = E_{interface} + 1/2 E_{I_2} - E_{I/interface}$$

94 where  $E_{interface}$ ,  $E_{I_2}$  and  $E_{I/interface}$  represent the energies of the liquid/electrode interface, I<sub>2</sub> in the  
95 gas phase and the liquid/electrode interface with the adsorbed I atoms, respectively.

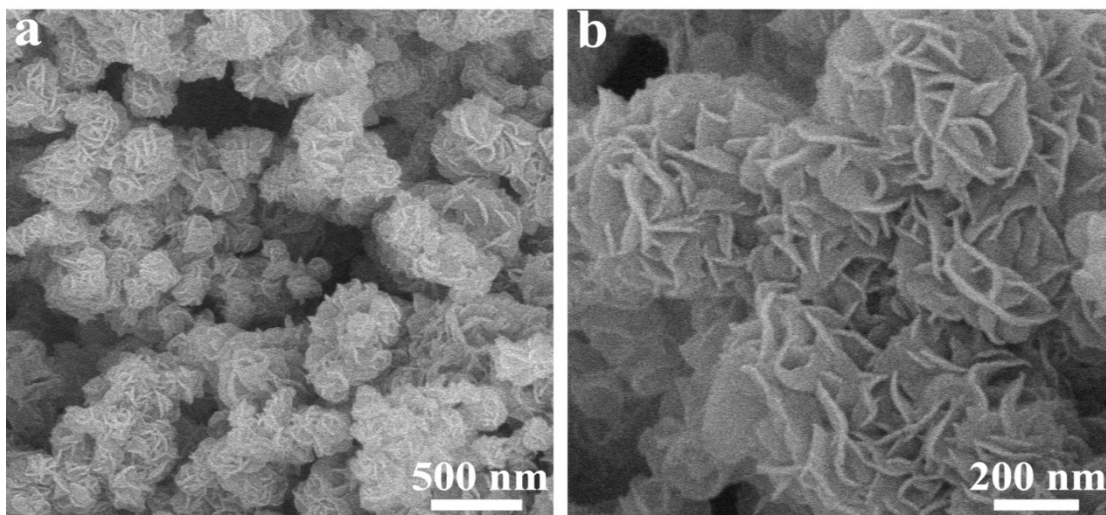

96

97 Figure S1 (a,b) SEM spectrum of MoS<sub>2</sub> nanoplates.

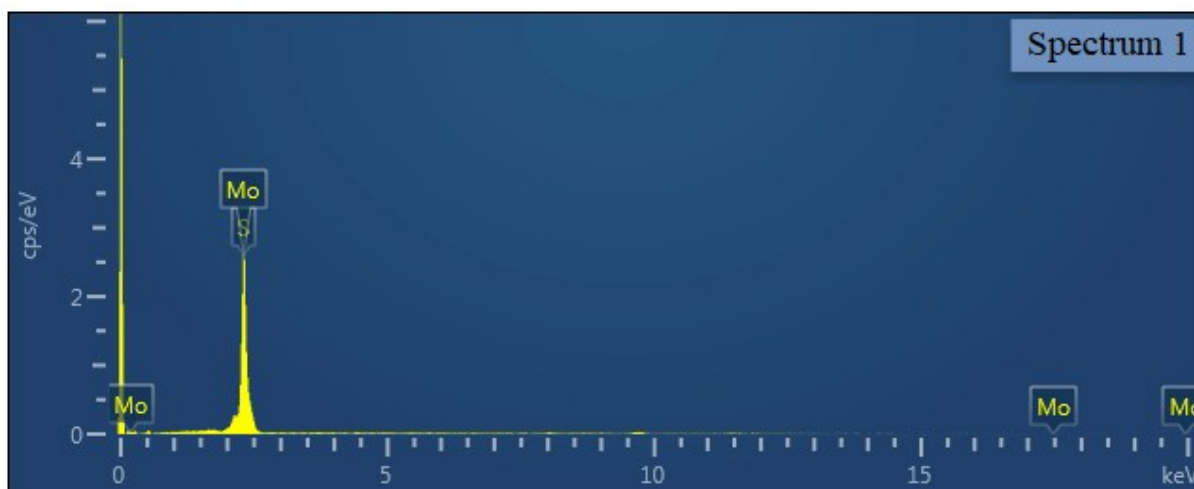

98

Figure S2 Elemental analysis of MoS<sub>2</sub> nanoplates.

99

Table S1 EDS analysis of MoS<sub>2</sub> nanoplates.

100

| Spectrum 1 | Type | Concentration | wt%    | wt% Sigma | % atom |
|------------|------|---------------|--------|-----------|--------|
| S          | K    | 17.83         | 43.95  | 2.76      | 70.12  |
| Mo         | L    | 19.85         | 56.05  | 2.76      | 29.88  |
| Total      |      |               | 100.00 |           | 100.00 |

101

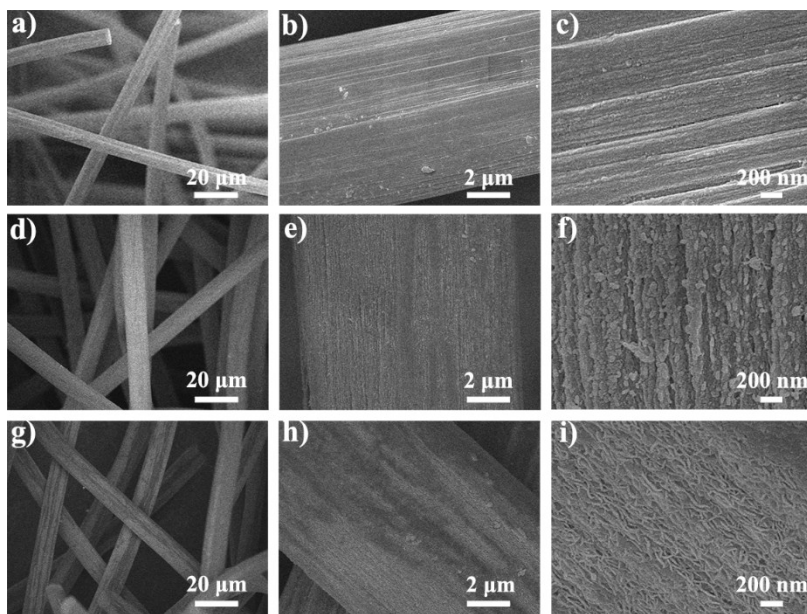

102

103 Figure S3. SEM images of (a–c) GF, (d–f) 15 mg MoS<sub>2</sub>@GF, (g–i) 25 mg MoS<sub>2</sub>@GF at  
104 different magnifications.

105

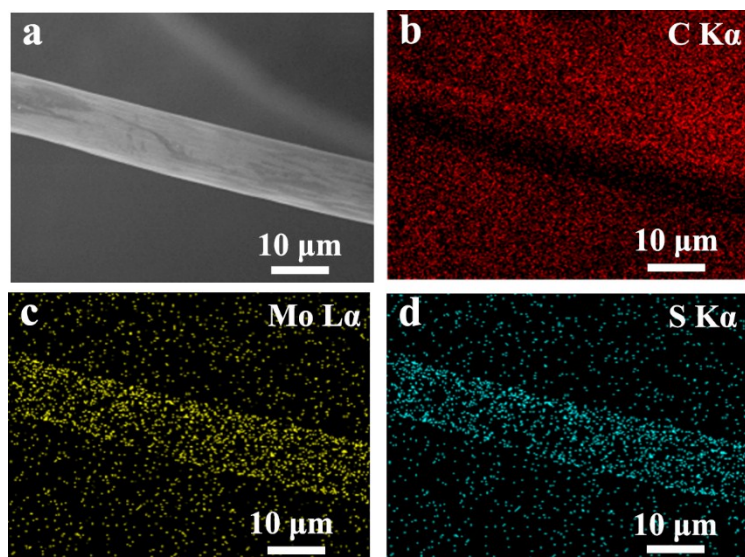

106

107 Figure S4. EDS mapping images of 20 mg MoS<sub>2</sub>@GF.

108



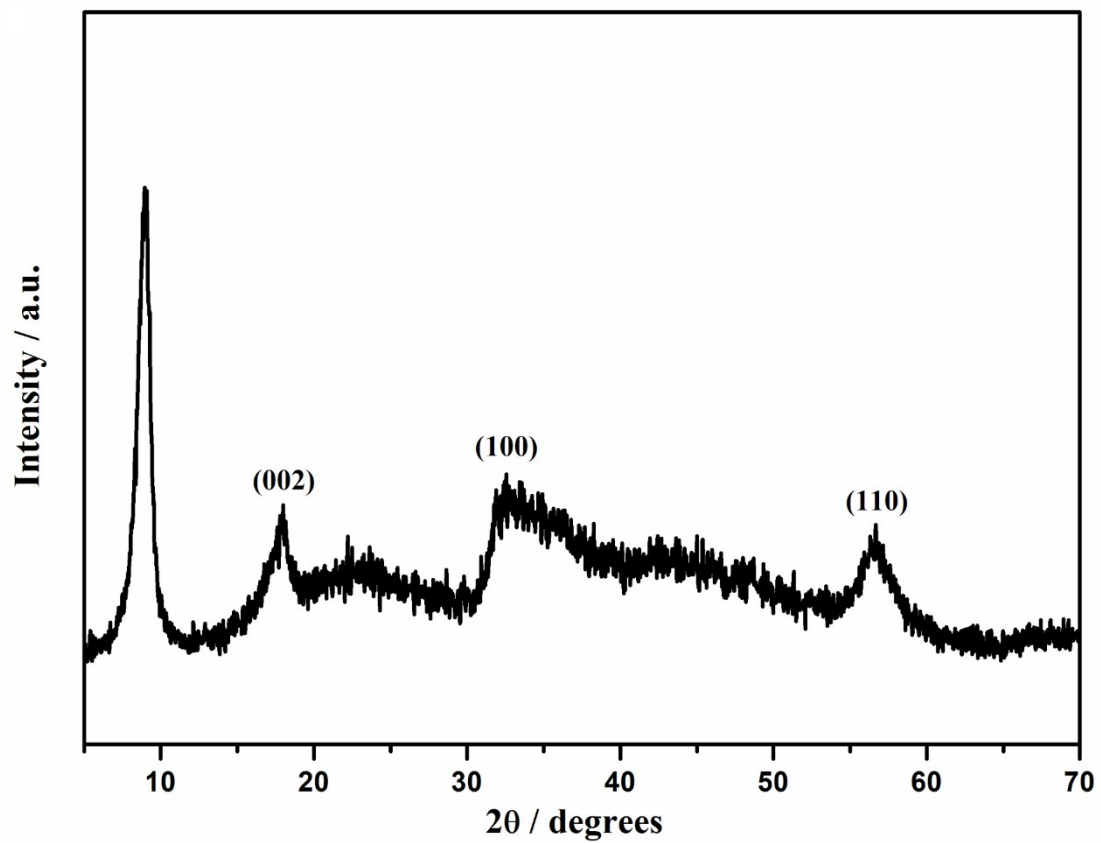

109

110 Figure S5. XRD pattern of the as-synthesized MoS<sub>2</sub>.

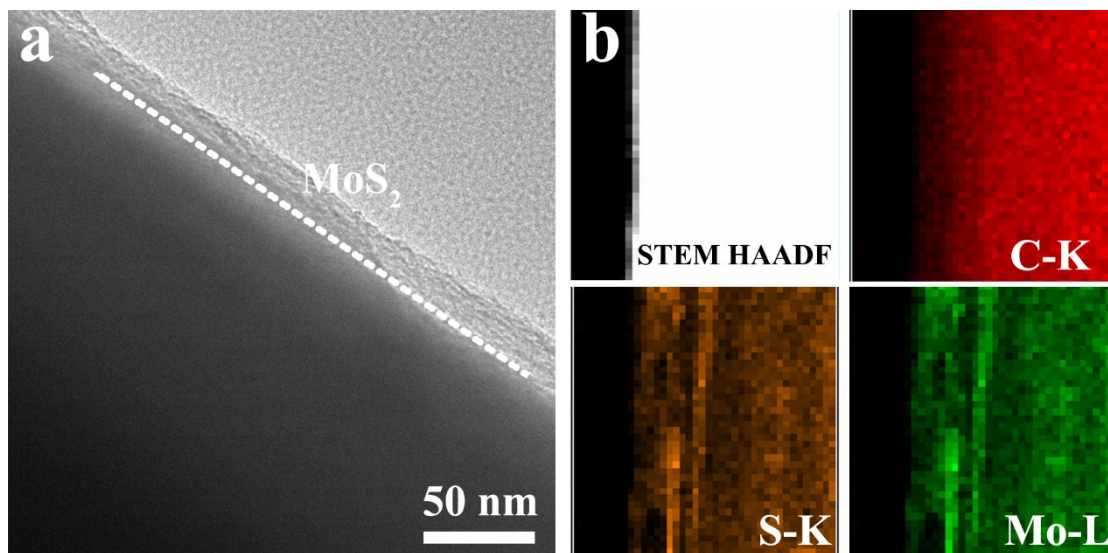

112

113 Figure S6. TEM images (a) of 20mg  $\text{MoS}_2$ @GF and the corresponding mapping images (b) of

114 C, Mo, and S elements.

115

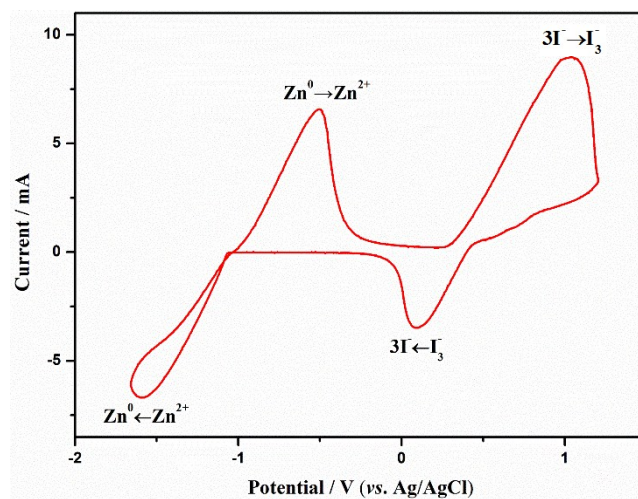

116

117 Figure S7. Cyclic voltammograms of 0.1 M ZnI<sub>2</sub> at the scan rate of 50 mV·s<sup>-1</sup>.

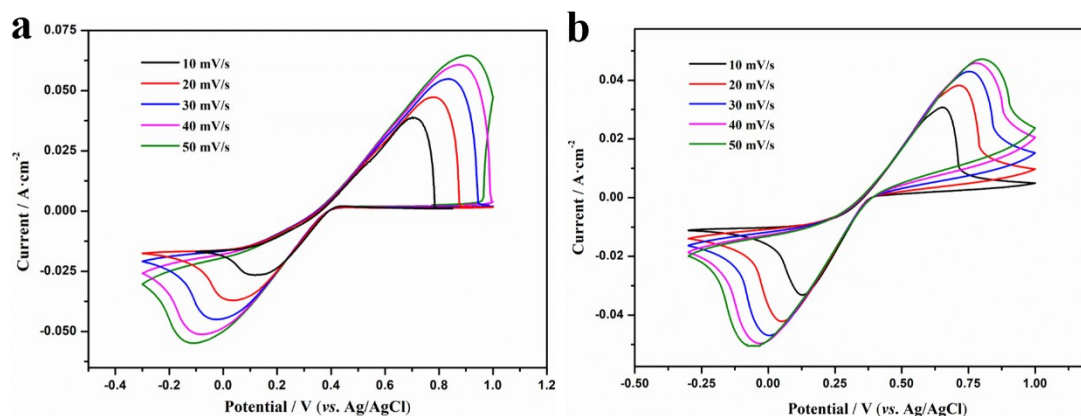

119

120 Figure S8. Cyclic voltammograms of 0.1 M  $ZnI_2$  & 0.1 M  $Zn(I_3)_2$  at different scan rate on GC  
 121 (a) and  $MoS_2@GC$  (b) electrode.

122

123 Table S2. Electrochemical Properties Obtained from Cyclic Voltammetry Results for GC and  
 124  $MoS_2@GC$  electrode at different Scan Rate.

| Scan rate<br>(mV/s) | Glassy carbon   |                   | $MoS_2$ -modified GC |                   |
|---------------------|-----------------|-------------------|----------------------|-------------------|
|                     | $\Delta E$ (mV) | $ i_{pa}/i_{pc} $ | $\Delta E$ (mV)      | $ i_{pa}/i_{pc} $ |
| 10                  | 0.582           | 0.685109          | 0.521                | 1.078049          |
| 20                  | 0.740           | 0.778545          | 0.661                | 1.101961          |
| 30                  | 0.860           | 0.820087          | 0.745                | 1.091967          |
| 40                  | 0.955           | 0.841724          | 0.801                | 1.082879          |
| 50                  | 1.015           | 0.848082          | 0.848                | 1.069915          |

125

126

127 The following equation can be utilized to calculate reaction rate constant of totally irreversible  
128 reactions.

129 
$$i_p = 0.227nFAC_0k^0 \exp\left(-\alpha nF \frac{E_p - E_0}{RT}\right)$$

130 Where  $i_p$  is the peak current density,  $n$  is number of transfer electron during electrode reaction,  
131  $F$  is faraday constant ( $F = 96485$  C/mol),  $A$  is surface area of the electrode (geometric area  $\sim$   
132  $0.2$  cm<sup>2</sup>),  $C_0$  is the electrolyte concentration ( $0.1$  M),  $k^0$  is the reaction rateconstant,  $\alpha$  is the  
133 symmetry coefficient and  $E_p$  is peak potential. The obtained  $\ln i_p$  is proportional to  $(E_p - E_0)$  with  
134 a slope of  $-\alpha nF/RT$  and an intercept proportional to  $k^0$ .

135

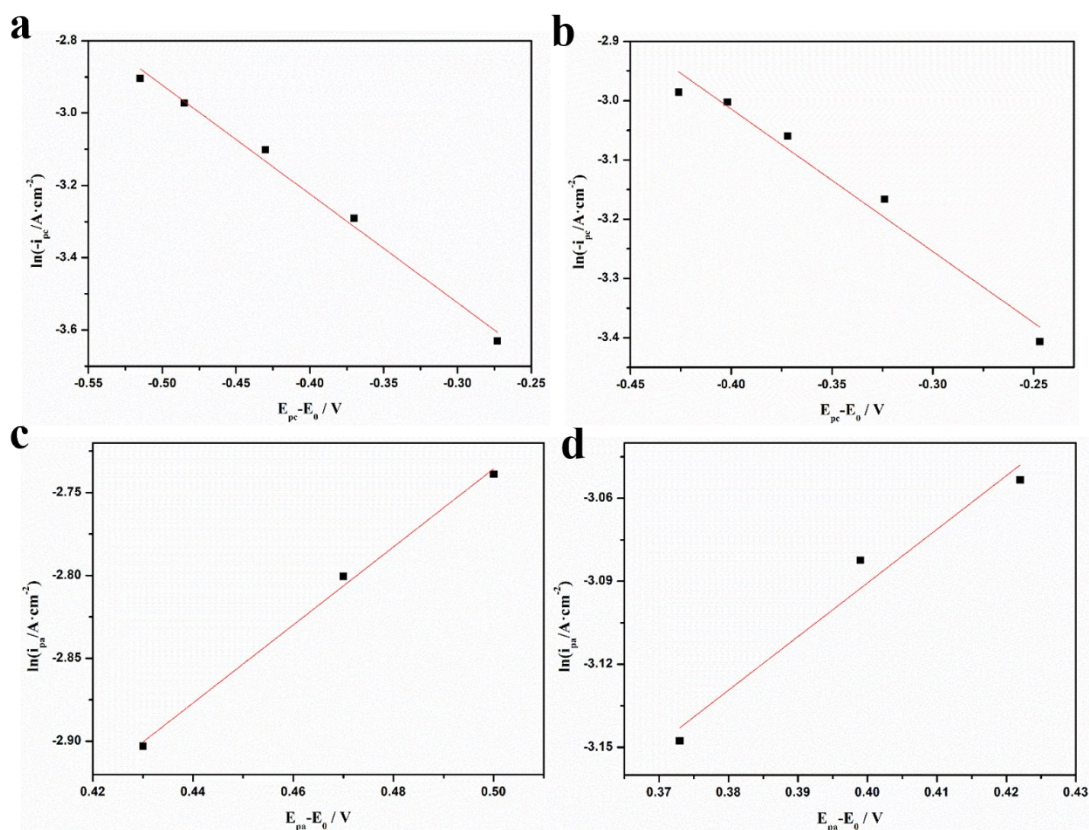

136

137 Figure S9. Plot of  $\ln(i_p)$  vs.  $(E_p-E_0)$  for (a, b) reduction of triiodide ions and (c, d) oxidation of  
 138 iodide ions for GC and MoS<sub>2</sub>@GC electrode.

139

140 Table S3 Reaction rate constant ( $k^0$ ) of GC and MoS<sub>2</sub>@GC electrode for triiodide/iodide  
 141 redox reactions.

| Sample           | Intercept (cathodic) | $k_c^0$ (cm·s <sup>-1</sup> ) | Intercept (anodic) | $k_a^0$ (cm·s <sup>-1</sup> ) |
|------------------|----------------------|-------------------------------|--------------------|-------------------------------|
| GC               | -3.9173              | 0.0136                        | -4.4274            | 0.0082                        |
| MoS <sub>2</sub> | -3.8659              | 0.0143                        | -3.9755            | 0.0128                        |

142

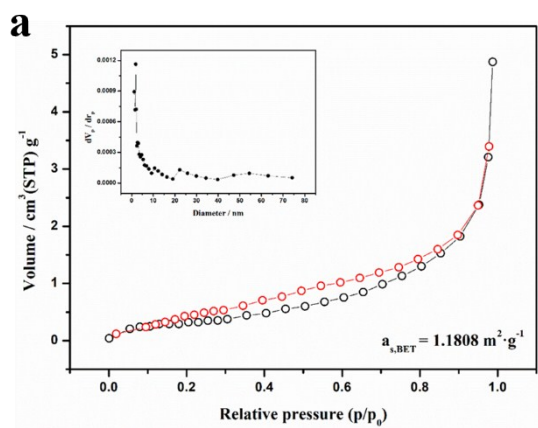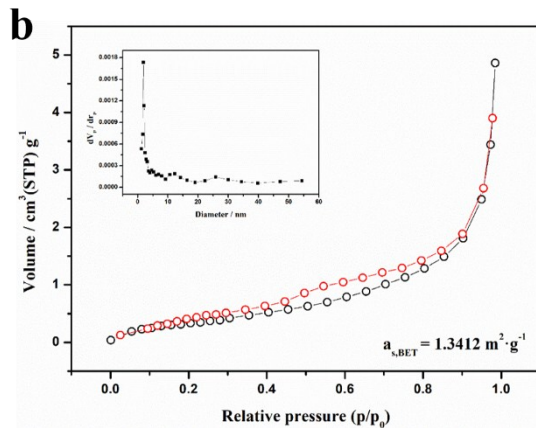

143

144 Figure S10. N<sub>2</sub> adsorption–desorption isotherms of GF (a) and 20 mg MoS<sub>2</sub>@GF (b).

145

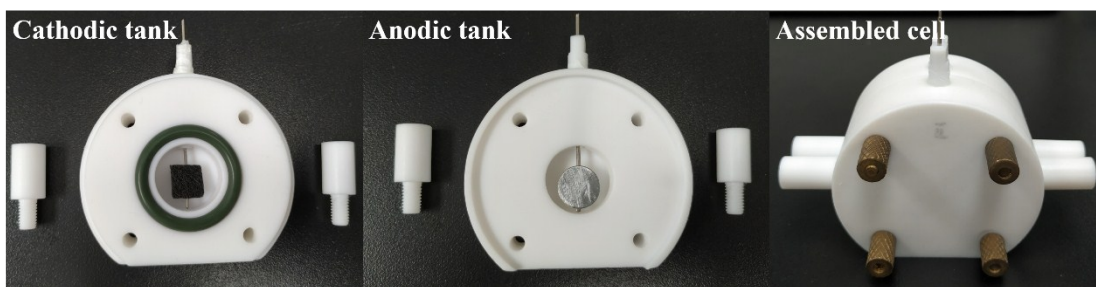

146

147 Figure S11. The structure of the non-flow cell.

148



149 The coulombic efficiency (CE), voltage efficiency (VE) and energy efficiency are determined  
 150 by the following equation.

$$CE = \frac{Q_d}{Q_c} = \frac{\int_0^{T_d} I_d dt}{\int_0^{T_c} I_c dt} = \frac{I_d T_d}{I_c T_c}$$

151

$$VE = \frac{\int_0^{T_d} E_d(t) dt}{T_d} = \frac{\bar{E}_d}{\bar{E}_c}$$

152

$$EE = \frac{\int_0^{T_d} I_d E_d(t) dt}{\int_0^{T_c} I_c E_c(t) dt} = \frac{I_d \int_0^{T_d} E_d(t) dt}{I_c \int_0^{T_c} E_c(t) dt} = CE \times VE$$

153

154 subscripts: c = charging, d = discharging, Q = charge, T= time for charging/discharging, and  
 155 E = potential.

156

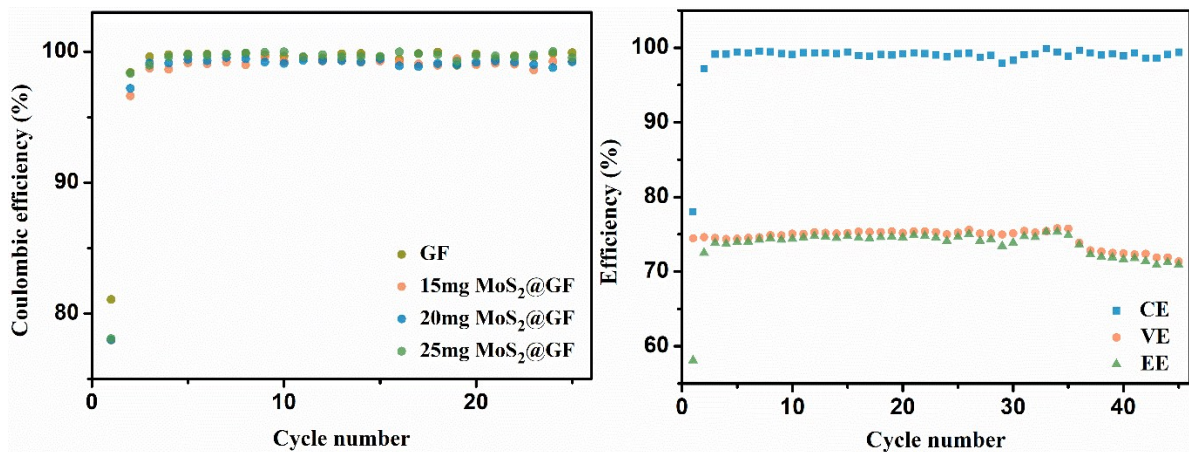

157

158 Figure S12. (a)Coulombic efficiency with different MoS<sub>2</sub> loading at a current density of 30  
 159 mA·cm<sup>-2</sup>. (b)efficiency with cycling numbers for 20 mg MoS<sub>2</sub>@GF.

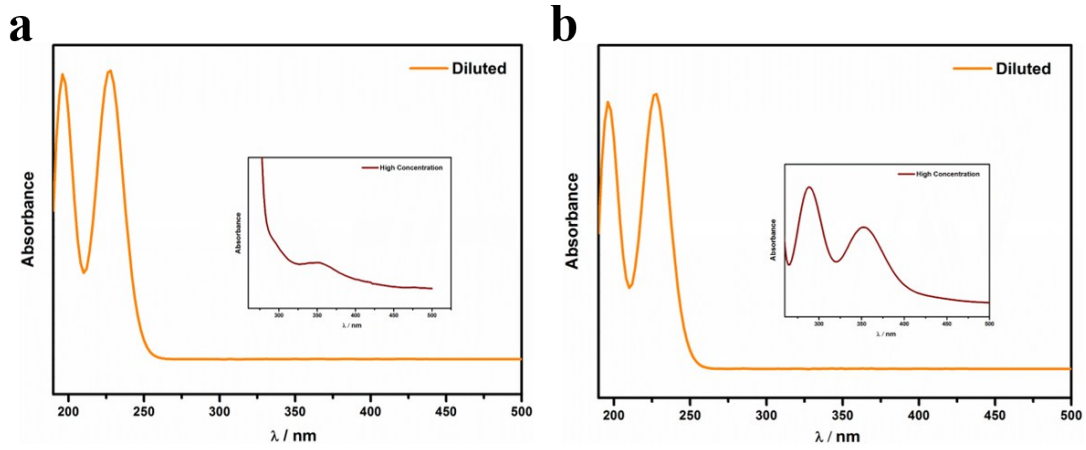

161

162 Figure S13. UV-Vis spectra of anode (a) and cathode (b) electrolyte after charge.

163 **References**

164 1 G. Kresse, D. Joubert, *Physical Review B.*, 1999, **59**, 1758.

165 2 Y. Hou, D. Wang, X. Yang, W. Fang, B. Zhang, H. Wang, G. Lu, P. Hu, H. Zhao, H. Yang,

166 *Nat. Commun.*, 2013, **4**, 1583.
